# Supplementary material
Source: MDPI journal article supplement (https://www.mdpi.com/2073-4433/8/2/33)
Supplement: s1 [file s1]

# Supplementary Materials: Temporal Variability of Source-Specific Solvent-Extractable Organic Compounds in Coastal Aerosols over Xiamen, China

Shuqin Tao, Xijie Yin, Liping Jiao, Shuhui Zhao and Liqi Chen

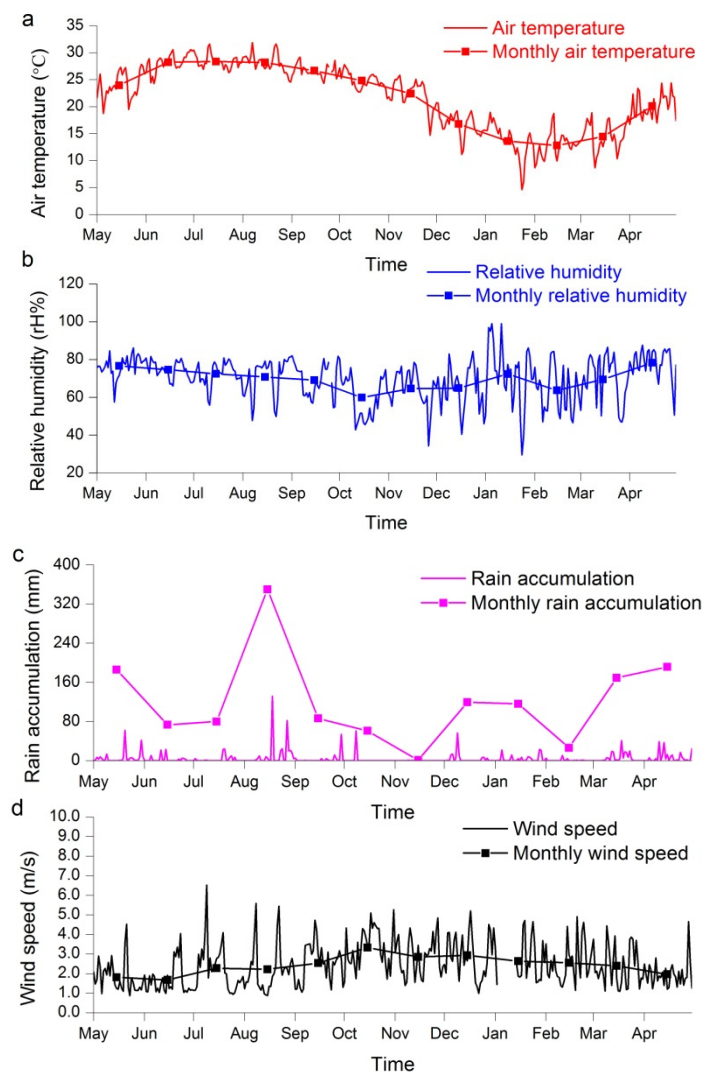

**Figure S1.** Daily and monthly meteorological characteristics in Xiamen during the period from 1 May 2015 to 30 April 2016. (a) air temperature; (b) relative humidity; (c) rain accumulation; and (d) wind speed.

Dendrogram using Average Linkage For n-alkanes (Between Groups)

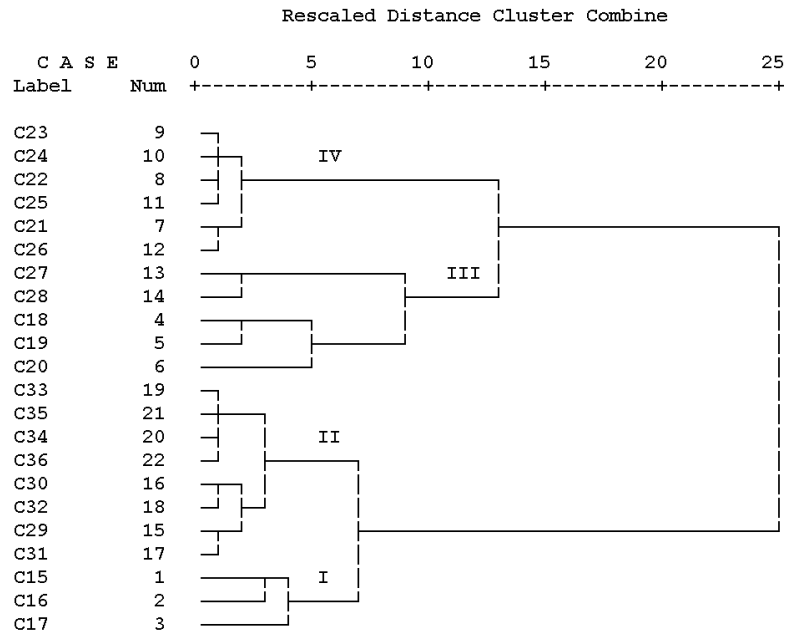

Dendrogram using Average Linkage For n-FAs (Between Groups)

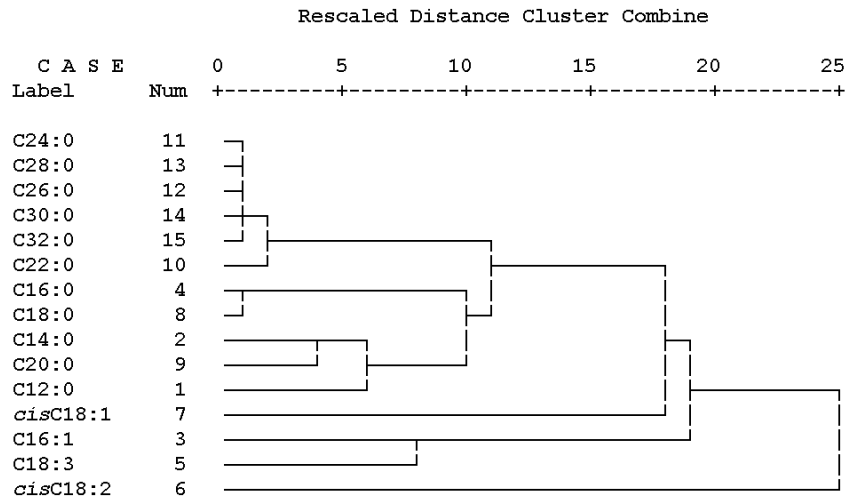

Dendrogram using Average Linkage for Alkanols (Between Groups)

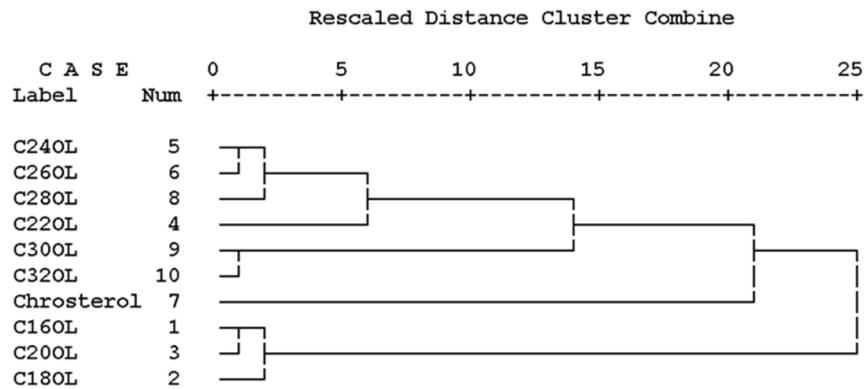

**Figure S2.** Hierarchical cluster analysis on TSP normalized contents of different lipids. (a) *n*-alkanes; (b) *n*-FAs; and (c) Alkanols.
